# Supplementary material for: Complete Genome of a Member of a New Bacterial Lineage in the Microgenomates Group Reveals an Unusual Nucleotide Composition Disparity Between Two Strands of DNA and Limited Metabolic Potential
Source: Microorganisms. 2020 Feb 25;8(3):320. doi: 10.3390/microorganisms8030320 (PMC7143001; doi:10.3390/microorganisms8030320)
Supplement: Supplementary file 1 [file microorganisms-08-00320-s001.zip › Table S1.xls]

## Sheet: Table S1  AAI
Table S1. Average amino acid identity (AAI) between Ch65 genome and phylogenetically related members of the order UBA1400
GenBank accession	AAI (%)	Proteins used	Proteins in the smaller genome	Scaffolds in assembly	Assembly length (bp)	Organism name
f_MFAQ01 (Ca. Collierbacteria)
GCA_001774555	48.18	500	838	37	750015	Candidatus Collierbacteria bacterium RIFCSPLOWO2_01_FULL_50_23
GCA_002347045	47.87	534	797	3	746201	Candidatus Collierbacteria bacterium UBA2277
GCA_000998275	47.41	528	804	15	730827	Candidatus Collierbacteria bacterium GW2011_GWA2_42_17
GCA_002789895	47.39	550	838	94	888137	Candidatus Collierbacteria bacterium CG_4_9_14_3_um_filter_43_16
GCA_001774685 (MFAS01000001)	47.23	580	838	1	1089434	Candidatus Collierbacteria bacterium RIFOXYD2_FULL_45_13
GCA_001000865	47.17	532	838	38	860944	Candidatus Collierbacteria bacterium GW2011_GWC2_44_18
GCA_001001485	47.13	560	838	18	894216	Candidatus Collierbacteria bacterium GW2011_GWB2_45_17
GCA_000998025	46.67	536	838	72	964574	Candidatus Collierbacteria bacterium GW2011_GWB1_44_6
GCA_003531665	46.62	541	838	44	1000587	Candidatus Collierbacteria bacterium isolate UBA12020
GCA_001776275	45.47	507	838	46	810160	Candidatus Collierbacteria bacterium RIFOXYD1_FULL_40_9
f_UBA12108
GCA_001003385	43.54	436	780	50	709943	Microgenomates group bacterium GW2011_GWF2_47_9
GCA_001002415	43.56	442	735	24	674048	Microgenomates group bacterium GW2011_GWF2_46_18
f_CG1-02-47-37 (Ca. Beckwithbacteria)
GCA_001029675 (CP011210)	44.28	522	838	1	1049888	Candidatus Beckwithbacteria bacterium GW2011_GWC1_49_16
complete genomes are marker in red
