# Supplementary material for: Complete Genome of a Member of a New Bacterial Lineage in the Microgenomates Group Reveals an Unusual Nucleotide Composition Disparity Between Two Strands of DNA and Limited Metabolic Potential
Source: Microorganisms. 2020 Feb 25;8(3):320. doi: 10.3390/microorganisms8030320 (PMC7143001; doi:10.3390/microorganisms8030320)
Supplement: Supplementary file 1 [file microorganisms-08-00320-s001.zip › Table S2.xls]

## Sheet: 16S RNA sequences
	Table S2. Environmental 16S rRNA gene sequences related to Ch65
	Description	Query coverage	Identity	Accession number	Isolation source
	Sequence identity >95%
	uncultured bacterium partial 16S rRNA gene	0.94	0.9979	LR634614.1	Wastewater treatment system
	Uncultured bacterium clone JSP_207 16S ribosomal RNA gene, and 16S-23S ribosomal RNA intergenic spacer gene, region	0.91	0.9978	MH445126.1	India: rhizospheric soil
	Uncultured planctomycete clone Pla_Austria-4 16S ribosomal RNA gene, partial sequence	0.91	0.9978	GQ356089.1	Anammox bio-reactor
	uncultured bacterium partial 16S rRNA gene	0.94	0.9971	LR653988.1	Wastewater treatment system
	uncultured bacterium partial 16S rRNA gene	0.94	0.9971	LR649052.1	Wastewater treatment system
	uncultured bacterium partial 16S rRNA gene	0.94	0.9971	LR643378.1	Wastewater treatment system
	Uncultured bacterium clone FPAS14 16S ribosomal RNA gene, partial sequence	0.91	0.9971	KX852027.1	anaerobic bioreactor
	Uncultured bacterium clone JSP_26 16S ribosomal RNA gene, and 16S-23S ribosomal RNA intergenic spacer gene, region	0.97	0.9965	MH444947.1	India: rhizospheric soil
	Uncultured bacterium clone 2-14 16S ribosomal RNA gene, partial sequence	0.97	0.9965	AY548947.1	ANAMMOX sludge
	Uncultured Chloroflexi bacterium gene for 16S ribosomal RNA, partial sequence, clone: B12	0.94	0.9964	AB780899.1	biogas slurry treating corn straw
	Uncultured bacterium clone FPAS20 16S ribosomal RNA gene, partial sequence	0.91	0.9956	KX852033.1	anaerobic bioreactor
	uncultured bacterium partial 16S rRNA gene	0.94	0.995	LR641184.1	Wastewater treatment system
	Uncultured bacterium partial 16S rRNA gene, clone HAW-RM37-2-B-650d-H	0.94	0.995	FN563155.1	Germany: mesophilic biogas digester; beet silage served as substrate
	uncultured bacterium partial 16S rRNA gene	0.94	0.9943	LR635445.1	Wastewater treatment system
	Uncultured bacterium clone FPAS43 16S ribosomal RNA gene, partial sequence	0.91	0.9941	KX852055.1	anaerobic bioreactor
	Uncultured bacterium clone JSP_30 16S ribosomal RNA gene, and 16S-23S ribosomal RNA intergenic spacer gene, region	0.96	0.9889	MH444950.1	rhizospheric soil
	Uncultured bacterium clone K2-4-19 16S ribosomal RNA gene, partial sequence	0.96	0.9889	AY371185.1	USA: Lake Kauhako, Hawaii
	Uncultured Unclassified bacterium 16S rRNA gene from clone QEDR1AB05	0.87	0.8989	CU922758.1	mesophilic anaerobic digester which treats municipal wastewater sludge
	Uncultured bacterium clone I1-16 16S ribosomal RNA gene, partial sequence	0.96	0.8766	KT880304.1	marine sponge
	Uncultured microorganism clone Group1_b 16S ribosomal RNA gene, partial sequence	0.85	0.8707	JN387276.1	Zodletone spring source sediment
	Uncultured bacterium clone PET-041 16S ribosomal RNA gene, partial sequence	0.96	0.8663	JF344165.1	petroleum spot over marine sediments from figueiras beach
	Uncultured bacterium clone Fe_B_130 16S ribosomal RNA gene, partial sequence	0.96	0.8616	GQ356947.1	methane seep sediment
	Uncultured bacterium clone SS1_B_08_10 16S ribosomal RNA gene, partial sequence	0.91	0.8514	EU050864.1	sediment from the Kings Bay, Svalbard
	Uncultured bacterium clone SHBH711 16S ribosomal RNA gene, partial sequence	0.88	0.8501	GQ350947.1	Saanich Inlet, 200 m depth
	Uncultured bacterium clone SHBH583 16S ribosomal RNA gene, partial sequence	0.89	0.849	GQ350884.1	Saanich Inlet, 200 m depth
	Uncultured bacterium clone SHBH976 16S ribosomal RNA gene, partial sequence	0.89	0.849	GQ351085.1	Saanich Inlet, 200 m depth
	Uncultured bacterium clone SHBH1109 16S ribosomal RNA gene, partial sequence	0.89	0.8482	GQ350760.1	Saanich Inlet, 200 m depth
	Uncultured bacterium clone sdm163 16S ribosomal RNA gene, partial sequence	0.96	0.8479	JQ798499.1	decomposed maize straw buried in soil
	Uncultured Chloroflexi bacterium clone OP1_14_2_B06 16S ribosomal RNA gene, partial sequence	0.94	0.8446	GU120561.1	leaking oil well close to Pitch Lake
	Uncultured Anaerolineales bacterium clone Agri_anode1_235 16S ribosomal RNA gene, partial sequence	0.94	0.8351	JN540144.1	soil from an agricultural site
	Uncultured Microgenomates bacterium clone ERBIntfc_RS296 16S ribosomal RNA gene, partial sequence	0.92	0.8349	KM018969.1	Red Sea; Brine-seawater interface of Erba Deep brine pool
	Candidatus Beckwithbacteria bacterium GW2011_GWA2_43_10 16S ribosomal RNA gene, partial sequence	0.9	0.8349	KX123402.1	aquifer sediment
	Uncultured bacterium clone T3-1_141 16S ribosomal RNA gene, partial sequence	0.96	0.8299	KX097665.1	deep-sea sediment
	Uncultured bacterium gene for 16S rRNA, partial sequence, clone: Suez.16S.Bac.18	0.96	0.8243	AB530186.1	marine sediment, Egypt:Suez
	Uncultured bacterium clone SGTA603 16S ribosomal RNA gene, partial sequence	0.89	0.8233	GQ348429.1	Saanich Inlet, 200 m depth
	Uncultured bacterium clone SEAB1DE031 16S ribosomal RNA gene, partial sequence	0.87	0.8216	KC432211.1	wetland
	Uncultured bacterium clone SIP13C_3G 16S ribosomal RNA gene, partial sequence	0.92	0.8182	KF741399.1	Talbert salt marsh sediment
	Uncultured bacterium clone BJGMM-3s-40 16S ribosomal RNA gene, partial sequence	0.97	0.817	JQ800869.1	soil, China: Yellow River Delta
	Candidatus Beckwithbacteria bacterium GW2011_GWB1_47_15 16S ribosomal RNA gene, partial sequence	0.99	0.816	KX123614.	aquifer sediment
	Candidatus Beckwithbacteria bacterium GW2011_GWA2_47_25 16S ribosomal RNA gene, partial sequence	0.99	0.816	KX123613.1	aquifer sediment
	Candidatus Beckwithbacteria bacterium GW2011_GWC1_49_16 chromosome, complete genome	0.99	0.8159	CP011210.1	aquifer sediment
	Microgenomates group bacterium GW2011_GWF2_46_18 16S ribosomal RNA gene, partial sequence	1362	0.8114	KX123573.1	aquifer sediment
	Candidatus Collierbacteria bacterium GW2011_GWF2_44_15 16S ribosomal RNA gene, partial sequence	0.99	0.8049	KX123396.1	aquifer sediment
	Candidatus Collierbacteria bacterium GW2011_GWC1_45_47 16S ribosomal RNA gene, partial sequence	0.99	0.8042	KX123395.1	aquifer sediment
